# Supplementary material for: A Bead-based Normalization for Uniform Sequencing depth (BeNUS) protocol for multi-samples sequencing exemplified by HLA-B
Source: PubMed Central journal article supplement (PMC4133082; doi:10.1186/1471-2164-15-645), 2014-08-04
Supplement: 12864_2014_6340_MOESM2_ESM.pdf [file 12864_2014_6340_MOESM2_ESM.pdf]

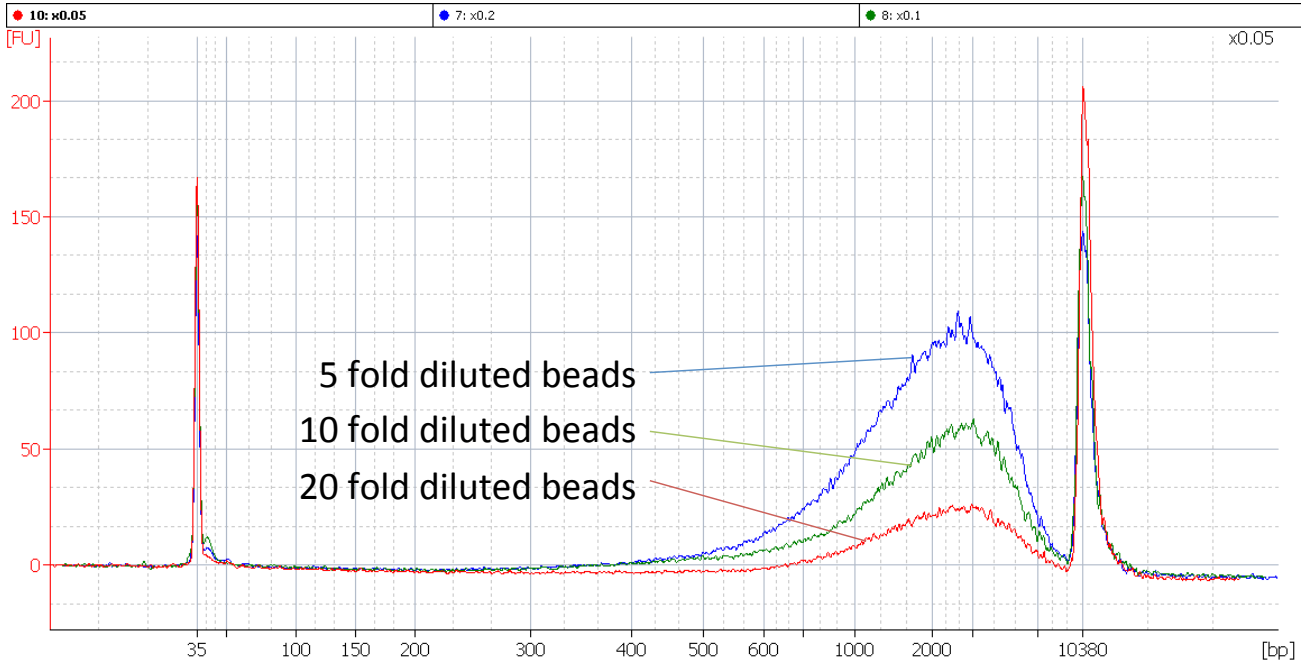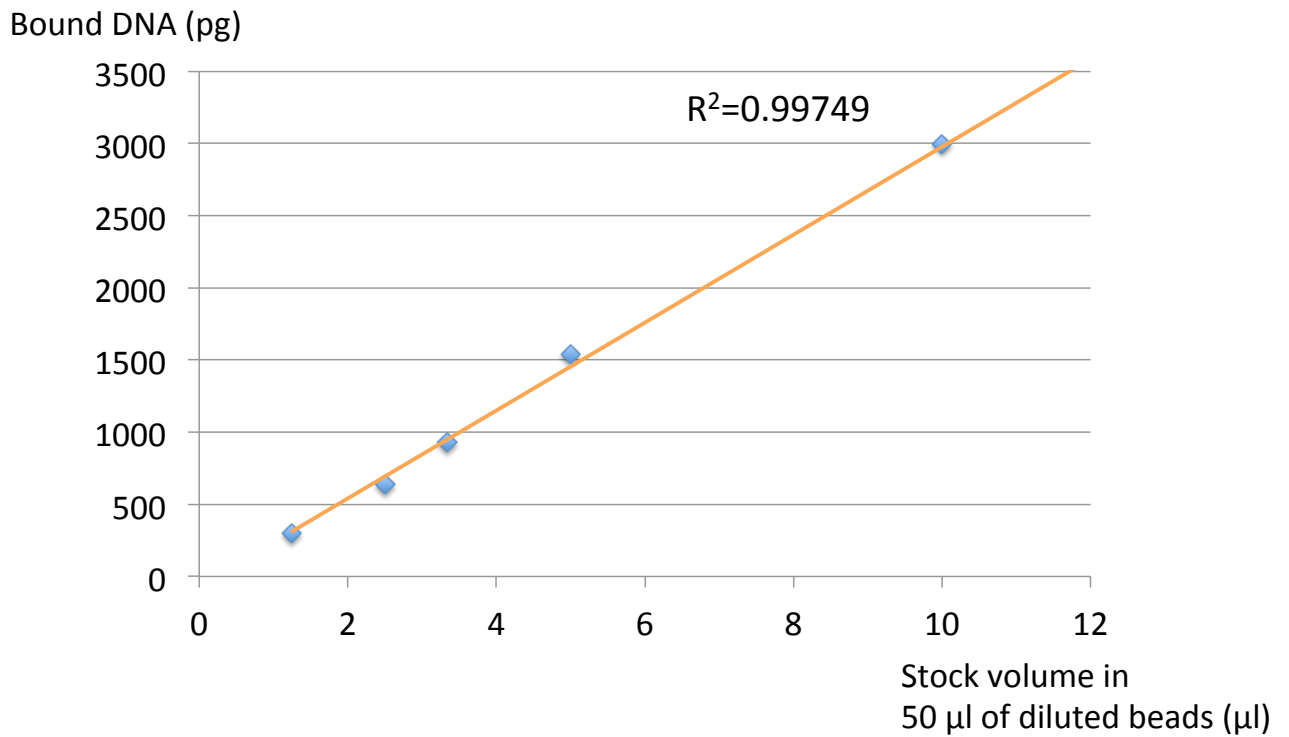

Supplementary figure 2 - Association between number of beads and bound DNA for normalization of DNA concentration
