# Supplementary material for: A Bead-based Normalization for Uniform Sequencing depth (BeNUS) protocol for multi-samples sequencing exemplified by HLA-B
Source: PubMed Central journal article supplement (PMC4133082; doi:10.1186/1471-2164-15-645), 2014-08-04
Supplement: 12864_2014_6340_MOESM6_ESM.pdf [file 12864_2014_6340_MOESM6_ESM.pdf]

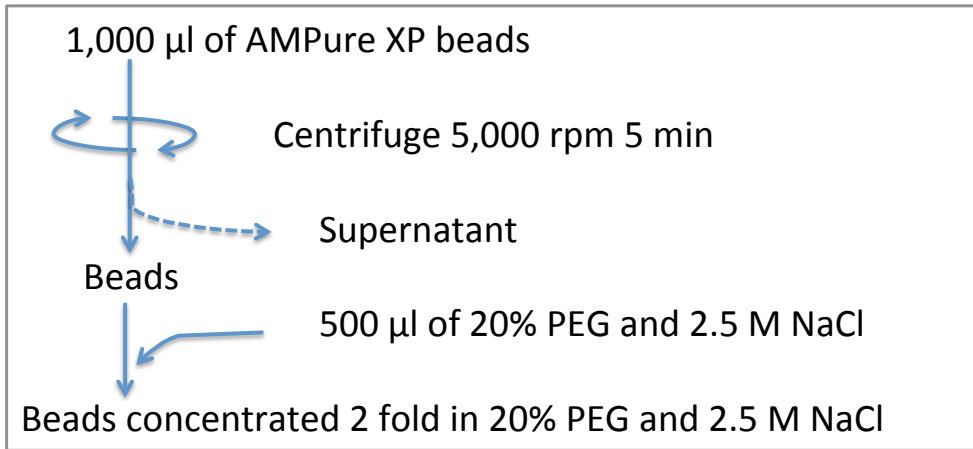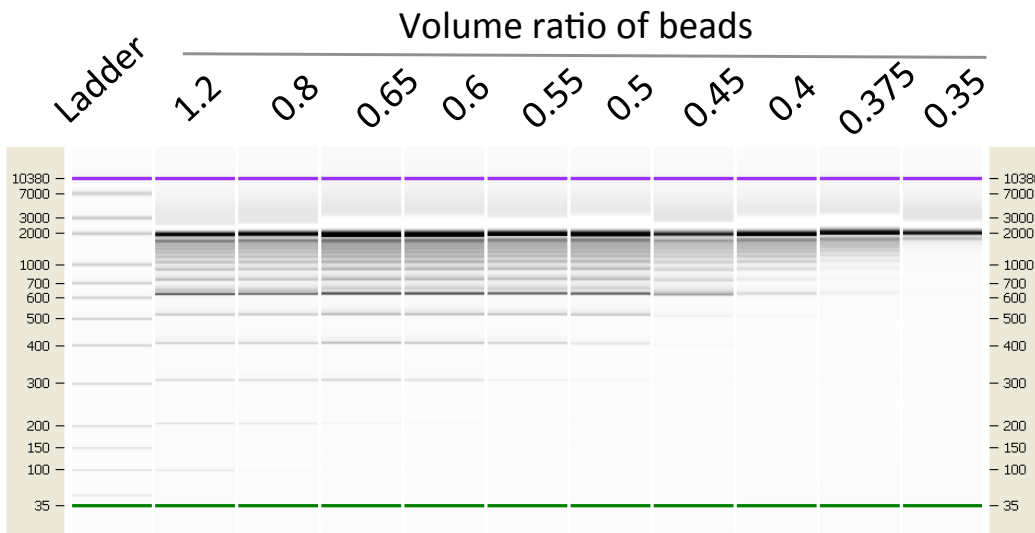

| Beads ratio | PEG (%) | NaCl (M) | Selected length |
|-------------|---------|----------|-----------------|
| 1.2x        | 10.9    | 1.36     | >100bp          |
| 0.8x        | 8.9     | 1.11     | >200bp          |
| 0.6x        | 7.5     | 0.94     | >300bp          |
| 0.5x        | 6.7     | 0.84     | >500bp          |
| 0.45x       | 6.2     | 0.78     | >600bp          |
| 0.4x        | 5.7     | 0.71     | >1000bp         |
| 0.35x       | 5.2     | 0.65     | >1500bp         |

Supplementary figure 6 - Altered AMPure XP beads and optimal bead volume in the DNA solution
